# Supplementary material for: HIV-1-Based Virus-like Particles that Morphologically Resemble Mature, Infectious HIV-1 Virions
Source: PubMed Central journal article supplement (PMC6630479; doi:10.3390/v11060507), 2019-06-02
Supplement: viruses-11-00507-s001.pdf [file viruses-11-00507-s001.pdf]

## Supplementary data

**Table S1.** Mutagenic primers used for plasmid construction.

| Name     | Sequence (5' to 3')                  |
|----------|--------------------------------------|
| Odp.0241 | GTCGTAACAACCTCCGCCCATTTG             |
| Odp.0479 | CATGCTGTCATCATTCTTCTA                |
| Odp.1067 | ATAGAATTCGCTTCTTTCAGTTGTCCTCC        |
| Odp.2856 | ATAAAGAATTCATAGTAGCAAAGGAAATAGTAGCC  |
| Odp.2857 | ATAAAGAATTCTCATCTAATCCTCATCCTGTCTACC |
| Odp.3032 | ATAAAGCGGCCGCTTTTCGCTTGTACTGGG       |
| Odp.3227 | GTACTCTAAATTTCTAAATTAGTCCTATTG       |
| Odp.3228 | CAATAGGACTAATTTAGAAATTTAGAGTAC       |
| Odp.3446 | TAGGCGGATCCGAACAAGCCCCAGAAGATCAAG    |
| Odp.3447 | ATCGACTACTCGAGATCTACCAGCTCCATTCC     |

**Table S2.** Ratio of gp120 to p24 concentration of viral particles used in fusion assay (Figure 8B), as determined by gp120 Western blotting and p24 ELISA, respectively. ND, not determined; NA, not applicable (because p24 could not be measured accurately).

| Sample                  | gp120/p24 concentration |
|-------------------------|-------------------------|
| AEB.NCΔRT (no BlaM-Vpr) | ND                      |
| AEΔB.NCΔRT              | 0                       |
| AEp55B                  | NA                      |
| AEB                     | 18.3                    |
| AEB.RT                  | 38.1                    |
| AEB.NCΔRT               | 29.1                    |
| AEΔB.NCΔRT + AD8 Env    | 10.0                    |
| 93TH293.3 + AD8 Env     | 5.44                    |

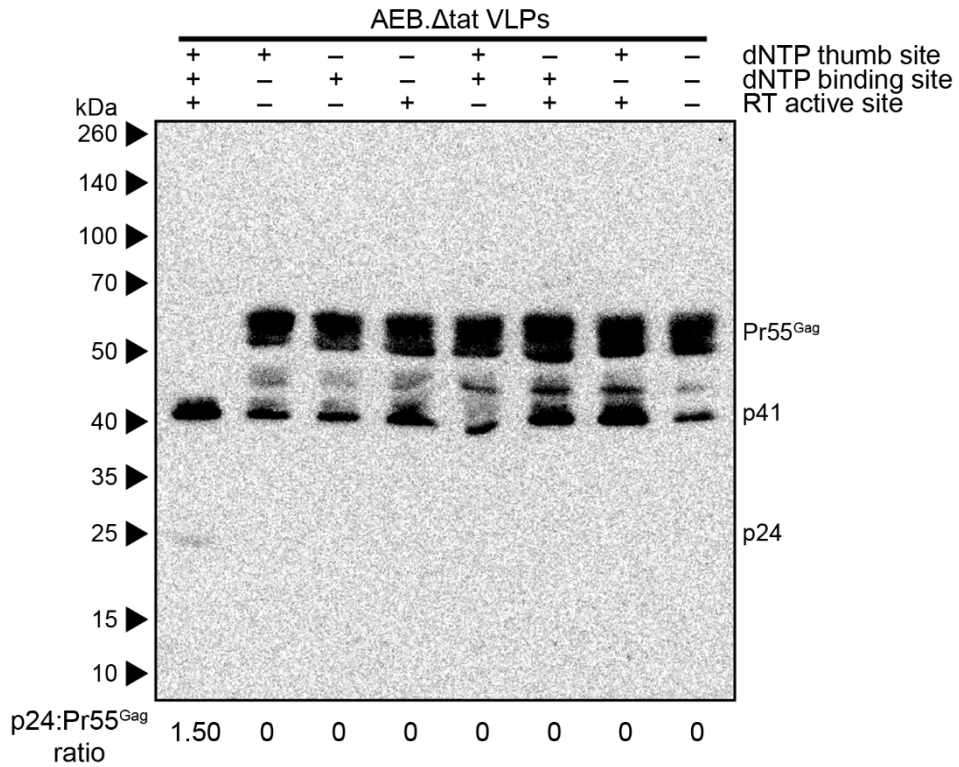

**Figure S1. Analysis of individual and combinations of RT mutations on AEB VLP Gag processing.** Representative anti-p24 (#24-4) Western blotting on AEB VLPs expressing a non-functional Tat with none, one, or more restorations of the RT domain deletions: dNTP thumb site, dNTP binding site, or RT active site, as indicated. Samples were resolved by 8–16% SDS-PAGE. The positions of Gag polyprotein cleavage products are indicated on the right and protein sizes were indicated on the left by Spectra Multicolour Broad Range Protein Ladder.
